# Supplementary material for: Ammonium Excess Leads to Ca Restrictions, Morphological Changes, and Nutritional Imbalances in Tomato Plants, Which Can Be Monitored by the N/Ca Ratio
Source: MDPI journal article supplement (doi:10.3390/agronomy11071437), 2021-07-20
Supplement: s1 [file s1]

## Supplementary Materials

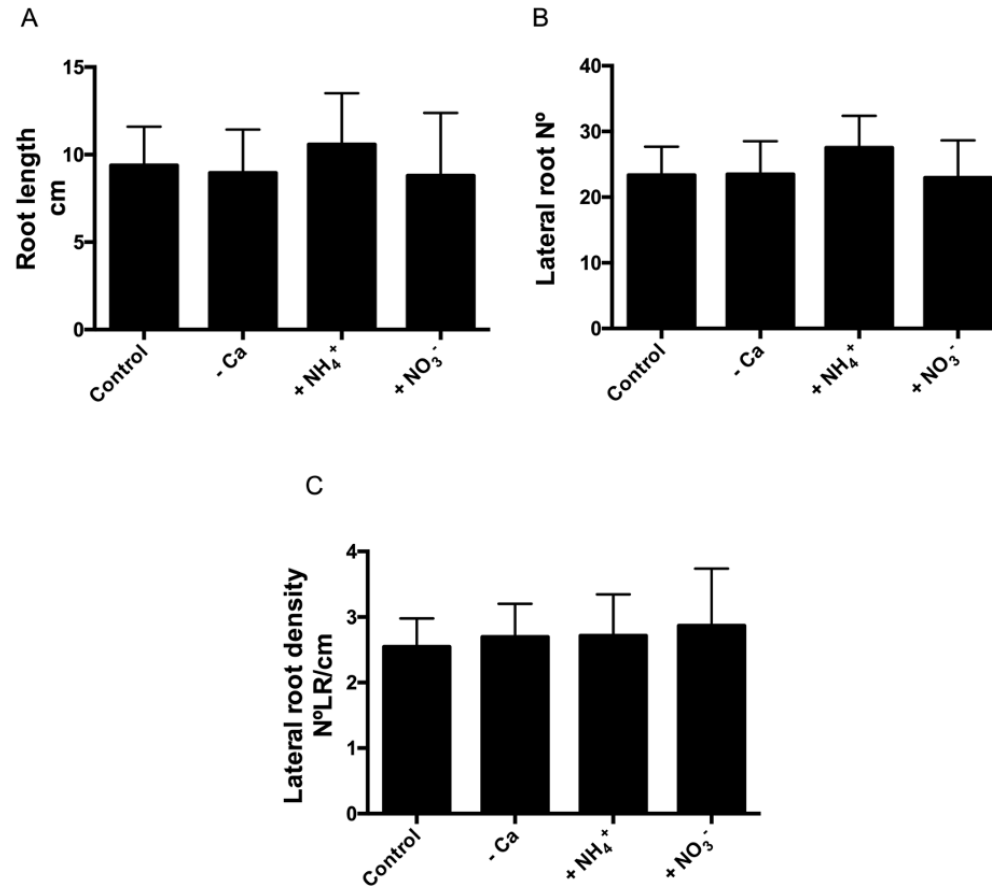

**Figure S1.** Root length and lateral root number are not altered in tomato seedlings under calcium deficit or ammonium and nitrate excesses. Tomato seedlings were grown with control media, with calcium deficit, or with ammonium or nitrate excesses for 10 days in a growth chamber as described in the Materials and Methods section. Tomato images were taken 10 days after sowing the seedlings: (A) main root length; (B) number of lateral roots; (C) lateral root density.

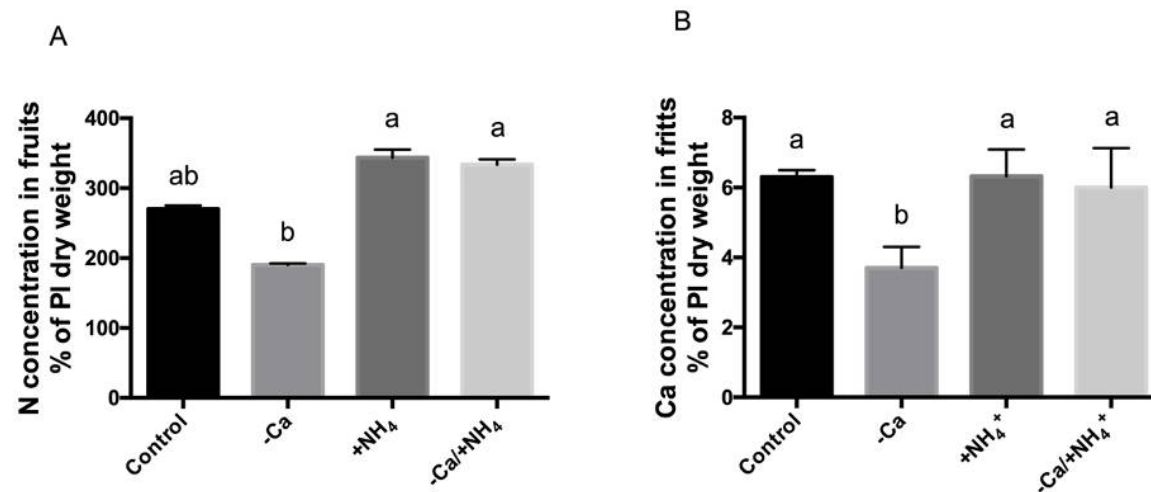

**Figure S2.** Nitrogen and calcium are altered by calcium deficit and not by ammonium and nitrate excesses in fruits. Tomato seedlings were grown with control media, with calcium deficit, or with ammonium or nitrate excesses for 10 days in a growth chamber as described in the Materials and Methods section. Tomato fruits were collected and dried at 45 °C in a dehydrator. Total nitrogen (A) and total calcium (B) were quantified as a percentage of plant dry weight. a, b represents statistically significant differences with  $p < 0.05$ .

**Table S1.** Media composition and nutritional content of *in-vitro* media.

| Component                           | Control            | Calcium deficyt | Ammonium excess | Nitrate excess |
|-------------------------------------|--------------------|-----------------|-----------------|----------------|
|                                     | Concentration mg/L |                 |                 |                |
| Calcium Nitrate                     | 328                | 33              | -               | 479            |
| Pottasium Nitrate                   | 303                | 303             | 200             | 505            |
| Sodium Nitrate                      | -                  | 153             | -               | 68             |
| Ammonium phosphate                  | 58                 | 58              | 680             | -              |
| Calcium Chloride                    | -                  | -               | 222             | -              |
| Calcium phosphate                   | -                  | -               | -               | 68             |
| Magnesium phosphate                 | 112                | 112             | 112             | 112            |
| Micronutrients (Fetrilon Combi 2-C) | 75                 | 75              | 75              | 75             |
| Sucrose                             | 10                 | 10              | 10              | 10             |
| MES                                 | 500                | 500             | 500             | 500            |
| Agar                                | 8                  | 8               | 8               | 8              |

| Nutrient | Concentration [mmol/L] |      |      |      |
|----------|------------------------|------|------|------|
|          |                        |      |      |      |
| N        | 5.5                    | 5.5  | 7.9  | 7.9  |
| Ca       | 2                      | 0.2  | 2    | 3.4  |
| Mg       | 0.93                   | 0.93 | 0.93 | 0.93 |
| P        | 0.5                    | 0.5  | 5.9  | 0.5  |
| K        | 3                      | 3    | 2    | 5    |
| S        | 0.93                   | 0.93 | 0.93 | 0.93 |
| Na       | -                      | 1.8  | -    | -    |
| Cl       | -                      | -    | 2    | -    |

**Table S2.** Media composition and nutritional content of *in-pot* media.

|                                              | MS macro- and micronutrients mg/L |                 |                 |                                 |
|----------------------------------------------|-----------------------------------|-----------------|-----------------|---------------------------------|
|                                              | Control                           | Calcium deficyt | Ammonium excess | Calcium deficyt/Ammonium excess |
| Calcium Chloride, Anhydrous                  | 166.1                             | -               | -               | -                               |
| Ammonium Nitrate                             | 825                               | -               | -               | -                               |
| Potassium Nitrate                            | 950                               | 1250            | 1250            | 1250                            |
| Ammonium Phosphate, Monobasic                | -                                 | 150             | 150             | 150                             |
| Urea                                         | -                                 | -               | 1800            | 1800                            |
| Boric Acid                                   | 3.1                               | 2.5             | 2.5             | 2.5                             |
| Cobalt Chloride•6H <sub>2</sub> O            | 0.0125                            | 0.05            | 0.05            | 0.05                            |
| Cupric Sulfate•5H <sub>2</sub> O             | 0.0125                            | 0.1             | 0.1             | 0.1                             |
| Na <sub>2</sub> EDTA•2H <sub>2</sub> O       | 18.63                             | 10              | 10              | 10                              |
| Ferrous Sulfate•7H <sub>2</sub> O            | 13.9                              | 7.5             | 7.5             | 7.5                             |
| Magnesium Sulfate, Anhydrous                 | 90.35                             | 97.7            | 97.7            | 97.7                            |
| Manganese Sulfate•H <sub>2</sub> O           | 8.45                              | 5               | 5               | 5                               |
| Molybdc Acid (Sodium Salt)•2H <sub>2</sub> O | 0.125                             | 0.05            | 0.05            | 0.05                            |
| Potassium Iodide                             | 0.415                             | 0.5             | 0.5             | 0.5                             |
| Zinc Sulfate•7H <sub>2</sub> O               | 4.3                               | 0.5             | 0.5             | 0.5                             |

**Table S3.** List of primers used.

| Gene name                | Primer Fw            | Primer Rv             |
|--------------------------|----------------------|-----------------------|
| <i>LeNRT1.1/LeNPF6.3</i> | TCCCAGATGCTTGGGATTAC | CACCGCCTCAATCCCTAATA  |
| <i>LeNRT2.1</i>          | GTGGTAAGCGTGTGGTTCC  | ACGACTCAGCACATTGAACCT |
| <i>LeNRT2.2</i>          | CGTGTCTGATCGGATTGATG | CCAGCGTATTGACAAGCAAC  |
| <i>LeNR</i>              | TTACAACTCCGTGCCATGAA | TCCATGTCTCTCCTCCATCC  |

**Table S4.** Nutritional data from in-vitro experiment used for PCA analysis.

| Treatment                               | N (%)  | P (%)  | K (%)   | Ca (%) | Mg (%) | N content (mg*pl <sup>-1</sup> ) | P content (mg*pl <sup>-1</sup> ) | K content (mg*pl <sup>-1</sup> ) | Ca content (mg*pl <sup>-1</sup> ) | Mg content (mg*pl <sup>-1</sup> ) | Cu content (mg*pl <sup>-1</sup> ) | Mn content (mg*pl <sup>-1</sup> ) | Zn content (mg*pl <sup>-1</sup> ) |
|-----------------------------------------|--------|--------|---------|--------|--------|----------------------------------|----------------------------------|----------------------------------|-----------------------------------|-----------------------------------|-----------------------------------|-----------------------------------|-----------------------------------|
| Control in-vitro                        | 6.15 c | 0.86 b | 5.39 ab | 1.66 b | 0.44 a | 1.14 a                           | 0.16 a                           | 1.00 b                           | 0.31 b                            | 0.08 ab                           | 0.0007 a                          | 0.013 b                           | 0.009 b                           |
| - Ca in-vitro                           | 5.35 d | 0.80 b | 4.96 b  | 0.47 c | 0.43 a | 1.11 a                           | 0.16 a                           | 1.03 b                           | 0.10 c                            | 0.09 a                            | 0.0008 a                          | 0.017 a                           | 0.013 a                           |
| + NH <sub>4</sub> <sup>+</sup> in-vitro | 7.14 a | 1.06 a | 2.81 c  | 0.6 c  | 0.19 b | 1.20 a                           | 0.18 a                           | 0.47 c                           | 0.10 c                            | 0.03 c                            | 0.0005 b                          | 0.002 d                           | 0.005 c                           |
| + NO <sub>3</sub> <sup>-</sup> in-vitro | 6.81 b | 0.47 c | 5.69 a  | 1.94 a | 0.4 a  | 1.27 a                           | 0.09 b                           | 1.27 a                           | 0.36 a                            | 0.08 b                            | 0.0007 a                          | 0.010 c                           | 0.006 c                           |

a, b, c, d represents statistically significant differences with  $p < 0.05$ .

**Table S5.** Nutritional data from potted plants used for PCA analysis.

| Treatment                                | N (%)   | P (%)  | K (%)  | Ca (%) | Mg (%) | N content (mg*pl <sup>-1</sup> ) | P content (mg*pl <sup>-1</sup> ) | K content (mg*pl <sup>-1</sup> ) | Ca content (mg*pl <sup>-1</sup> ) | Mg content (mg*pl <sup>-1</sup> ) | Cu content (mg*pl <sup>-1</sup> ) | Mn content (mg*pl <sup>-1</sup> ) | Zn content (mg*pl <sup>-1</sup> ) |
|------------------------------------------|---------|--------|--------|--------|--------|----------------------------------|----------------------------------|----------------------------------|-----------------------------------|-----------------------------------|-----------------------------------|-----------------------------------|-----------------------------------|
| Control pots                             | 4.88 ab | 0.29 c | 3.75 b | 2.42 a | 1.16 a | 1925.37 b                        | 115.19 b                         | 1479.71 ab                       | 921.28 a                          | 443.79 a                          | 0.12 a                            | 2.20 a                            | 2.20 b                            |
| - Ca pots                                | 3.31 b  | 0.55 a | 5.93 a | 1.15 b | 0.57 b | 600.54 c                         | 97.66 b                          | 1066.50 b                        | 210.20 b                          | 108.55 b                          | 0.043 b                           | 1.44 b                            | 1.44 c                            |
| + NH <sub>4</sub> <sup>+</sup> pots      | 7.37 a  | 0.29 c | 3.82 b | 1.54 b | 0.77 b | 3252.93 a                        | 129.05 ab                        | 1684.56 ab                       | 679.36 a                          | 340.36 a                          | 0.09 ab                           | 2.99 a                            | 2.99 a                            |
| +NH <sub>4</sub> <sup>+</sup> x -Ca pots | 6.37 a  | 0.46 b | 3.97 b | 1.51 b | 0.77 b | 2924.61 a                        | 216.07 a                         | 1825.99 a                        | 704.71 a                          | 362.17 a                          | 0.065 b                           | 1.82 a                            | 1.82 b                            |

a, b, c, d represents statistically significant differences with  $p < 0.05$ .

**Table S6.** Normalized nutritional and phenotypic data used for PCA analysis.

| Treatment                                 | N (% of pl dry weight) | P (% of pl dry weight) | K (% of pl dry weight) | Ca (% of pl dry weight) | Mg (% of pl dry weight) | N content (% relative to ctrl) | P content (% relative to ctrl) | K content (% relative to ctrl) | Ca content (% relative to ctrl) | Mg content (% relative to ctrl) | Cu content (% relative to ctrl) | Mn content (% relative to ctrl) | Zn content (% relative to ctrl) | Plant Dry weight (% relative to ctrl) | Shoot dry weight (% relative to ctrl) | Root Dry weight (% relative to ctrl) | N/K ratio | N/Ca ratio |
|-------------------------------------------|------------------------|------------------------|------------------------|-------------------------|-------------------------|--------------------------------|--------------------------------|--------------------------------|---------------------------------|---------------------------------|---------------------------------|---------------------------------|---------------------------------|---------------------------------------|---------------------------------------|--------------------------------------|-----------|------------|
| Control in-vitro                          | 6.1                    | 0.9                    | 5.4                    | 1.7                     | 0.4                     | 100.0                          | 100.0                          | 100.0                          | 100.0                           | 100.0                           | 100.0                           | 100.0                           | 100.0                           | 100.0                                 | 100.0                                 | 100.0                                | 1.1       | 3.7        |
| - Ca in-vitro                             | 5.3                    | 0.8                    | 5.0                    | 0.5                     | 0.4                     | 97.0                           | 103.0                          | 102.7                          | 31.6                            | 108.9                           | 103.0                           | 125.1                           | 145.3                           | 116.0                                 | 114.1                                 | 122.0                                | 1.1       | 11.4       |
| + NH <sub>4</sub> <sup>+</sup> in-vitro   | 7.1                    | 1.1                    | 2.8                    | 0.6                     | 0.2                     | 104.8                          | 110.6                          | 46.9                           | 32.6                            | 37.9                            | 71.9                            | 18.0                            | 60.6                            | 97.0                                  | 91.7                                  | 115.5                                | 2.6       | 11.9       |
| + NO <sub>3</sub> <sup>-</sup> in-vitro   | 6.8                    | 0.5                    | 5.7                    | 1.9                     | 0.4                     | 111.4                          | 54.4                           | 127.1                          | 117.3                           | 91.5                            | 91.7                            | 78.7                            | 68.1                            | 102.7                                 | 101.2                                 | 95.0                                 | 1.2       | 3.5        |
| Control pots                              | 4.9                    | 0.3                    | 3.7                    | 2.4                     | 1.2                     | 100.0                          | 100.0                          | 100.0                          | 100.0                           | 100.0                           | 100.0                           | 100.0                           | 100.0                           | 100.0                                 | 100.0                                 | 100.0                                | 1.3       | 2.1        |
| - Ca pots                                 | 3.3                    | 0.6                    | 5.9                    | 1.2                     | 0.6                     | 31.2                           | 84.8                           | 72.1                           | 22.8                            | 24.5                            | 36.7                            | 32.1                            | 65.4                            | 74.2                                  | 51.6                                  | 102.9                                | 0.5       | 2.9        |
| + NH <sub>4</sub> <sup>+</sup> pots       | 7.4                    | 0.3                    | 3.8                    | 1.5                     | 0.8                     | 169.0                          | 112.0                          | 113.8                          | 73.7                            | 76.7                            | 76.0                            | 135.1                           | 135.6                           | 94.6                                  | 113.6                                 | 99.1                                 | 1.9       | 4.8        |
| + NH <sub>4</sub> <sup>+</sup> x -Ca pots | 6.4                    | 0.5                    | 4.0                    | 1.5                     | 0.8                     | 151.9                          | 187.6                          | 123.4                          | 76.5                            | 81.6                            | 55.6                            | 110.1                           | 82.6                            | 99.2                                  | 110.1                                 | 177.0                                | 1.6       | 4.3        |
